# Conditions for maintaining and eroding pseudo-overdominance and its contribution to inbreeding depression

Diala Abu Awad<sup>\*1,‡</sup> and Donald Waller<sup>†2</sup>

<sup>1</sup>Professorship for Population Genetics, Department of Life Science Systems,  
Technical University of Munich, Germany

<sup>2</sup>Department of Botany, University of Wisconsin, Madison, WI USA

<sup>‡</sup>Current affiliation: Université Paris-Saclay, INRAE, CNRS, AgroParisTech,  
GQE—Le Moulon, Gif-sur-Yvette, France

## Abstract

1  
2 Classical models that ignore linkage predict that deleterious recessive mutations  
3 should purge or fix within inbred populations, yet inbred populations often retain mod-  
4 erate to high segregating load. True overdominance could generate balancing selection  
5 strong enough to sustain inbreeding depression even within inbred populations, but this  
6 is considered rare. However, arrays of deleterious recessives linked in repulsion could gen-  
7 erate appreciable pseudo-overdominance that would also sustain segregating load. We  
8 used simulations to explore how long pseudo-overdominant (POD) zones persist once cre-  
9 ated (e.g., by hybridization between populations fixed for alternative mildly deleterious  
10 mutations). Balanced haplotype loads, tight linkage, and moderate to strong cumula-  
11 tive selective effects all serve to maintain POD zones. Tight linkage is key, suggesting  
12 that such regions are most likely to arise and persist in low recombination regions (like

---

\*diala.abu-awad@universite-paris-saclay.fr

†dmwaller@wisc.edu

13        inversions). Selection and drift unbalance the load, eventually eliminating POD zones,  
14        but this process is quite slow under strong pseudo-overdominance. Background selection  
15        accelerates the loss of weak POD zones but reinforces strong ones in inbred populations  
16        by disfavoring homozygotes. Models and empirical studies of POD dynamics within  
17        populations help us understand how POD zones may allow the load to persist, greatly  
18        affecting load dynamics and mating systems evolution.

19        **Keywords:** Inbreeding; purging; fixation; drift load; pseudo-overdominance; associative  
20        overdominance; POD; linkage; recombination.

## 21 1 Introduction

22 Inbreeding depression ( $\delta$ ) is defined as the lower fitness of inbred compared to outbred  
23 individuals (Darwin, 1876). It is now generally accepted that  $\delta$  is mainly due to the ex-  
24 pression of segregating deleterious recessive mutations (Charlesworth and Charlesworth,  
25 1987; Crow, 1993; Bataillon and Kirkpatrick, 2000; Roze, 2015). As direct selection,  
26 background selection, genetic drift and inbreeding all act to reduce diversity at such  
27 loci, maintaining non-negligible levels of inbreeding depression is difficult to explain  
28 (Byers and Waller, 1999; Winn et al, 2011). Examples include inbred lines of *Zea mays*  
29 Kardos et al (2014); Larièpe et al (2012), *Arabidopsis* (Seymour et al, 2016), *Mimulus*  
30 (Brown and Kelly, 2020) and *C. elegans* (Chelo et al, 2019; Bernstein et al, 2019). Such  
31 observations led many to conclude that overdominant selection, *i.e.* a higher fitness of  
32 heterozygotes compared to either homozygote, was operating (Kimura and Ohta, 1971;  
33 Charlesworth and Charlesworth, 1987). But truly overdominant loci are rare, and most  
34 effects previously attributed to overdominance (such as heterosis and hybrid vigor) can  
35 be explained by simple dominance interactions (Crow, 1999a). Curiously, analyses of  
36 inbreeding depression often detect evidence of overdominance (see for example Baldwin  
37 and Schoen 2019). These apparent overdominant effects, however, probably reflect the  
38 effects of many deleterious recessive mutations linked in repulsion, a phenomenon termed  
39 pseudo-overdominance (hereafter POD, introduced by Ohta and Kimura 1969; reviewed  
40 by Waller 2021). We have known for half a century that a single strong overdominant  
41 locus can generate enough selection against homozygotes to persist even under com-  
42 plete self-fertilization (Kimura and Ohta, 1971). Could such strong effects also arise and  
43 persist via pseudo-overdominance?

44 Pseudo-overdominant selection will only emerge in genomic regions where many dele-  
45 terious alleles are clustered together and often linked in repulsion, generating complemen-  
46 tary haplotypes that express similar inbreeding loads as homozygotes. Genomic regions  
47 with reduced recombination, such as centromeric regions and chromosomal inversions,  
48 often maintain higher than expected heterozygosity. Centromeric regions in *Zea mays*,  
49 for example, maintain heterozygosity even after repeated generations of inbreeding (Mc-

50 Mullen et al, 2009). This has also been found in 22 centromeric regions in the human  
51 genome (Gilbert et al, 2020). Kremling et al (2018) confirmed that many rare variants  
52 in maize express deleterious effects confirming that “even intensive artificial selection is  
53 insufficient to purge genetic load.” Brandenburg et al (2017) identified 6,978 genomic  
54 segments ( $\approx 9\%$  of the genome) with unexpectedly high heterozygosity in land races of  
55 maize. These heterozygous segments contained more deleterious mutations than other  
56 parts of the genome, with several deeply conserved across multiple land races. Inver-  
57 sions, which halt recombination, also appear to accumulate lasting loads of deleterious  
58 mutations. Jay et al (2021) found that ancient inversions contribute greatly to heterosis  
59 in *Heliconius* butterflies. Kirkpatrick (2010) concluded that although the genetic basis  
60 for inversion overdominance has not yet been clearly determined, POD is plausible.

61 Pseudo-overdominance (POD) at many loci of small effect should mimic overdom-  
62 inant selection at a single locus, favouring heterozygosity for load within particular  
63 genomic regions. This could sustain inbreeding depression even in the face of purify-  
64 ing selection and drift. For POD to influence species evolution, it must exist for long  
65 enough and generate enough overdominant selection to leave a signature. Recombina-  
66 tion, however, acts to break up such regions by unbalancing haplotype loads, allowing  
67 selection and drift to purge or fix their mutations. It is thus remarkable that polymor-  
68 phic inversions expressing balancing selection date back to ancient hybridization events  
69 in *Heliconius* butterflies (Jay et al, 2021). Similarly, five ancient polymorphic zones  
70 predate the divergence of *Arabidopsis* from *Capsella* (approx. 8 million generations ago,  
71 Wu et al, 2017). These observations suggest that polymorphic regions may generate  
72 enough selection to sustain themselves for long periods of time. Could this selection  
73 derive from POD?

74 Several mechanisms might generate enough initial overdominance to create a POD  
75 zone including crosses between independently inbred lineages or sub-populations (gener-  
76 ating high heterosis in the F1), a truly overdominant (e.g., self-incompatibility) locus, or  
77 chromosomal inversions where recombination is strongly suppressed, allowing mutations  
78 to accumulate. Here, we use simulations to study the evolutionary dynamics of POD

79 zones generated initially by admixture between two populations fixed for different sets  
80 of deleterious mutations. In this scenario, high fitness emerges in the F1 where mu-  
81 tations fixed within each population are ‘masked’ as heterozygotes in hybrid offspring  
82 (Kim et al, 2018). We extend existing theory regarding the stable polymorphism that  
83 can exist at a single bi-allelic overdominant locus to examine the conditions necessary  
84 for POD to maintain two haplotypes containing many linked recessive deleterious muta-  
85 tions as heterozygotes. Because pseudo-overdominance depends on tight linkage among  
86 these loci, we expect that over time such zones will be vulnerable to being broken up  
87 by recombination. We therefore also explore how varying levels of linkage, dominance,  
88 selection and selfing rates affect POD zone stability and decay. Finally, we test how  
89 selection elsewhere in the genome affects the ability of POD zones to persist and the  
90 reciprocal effects of POD zones on load dynamics elsewhere in the genome.

## 91 2 Approaches

### 92 2.1 Load needed to generate a POD

93 Kimura and Ohta (1971) demonstrated that when the selective effects generating true  
94 overdominance are strong enough, a stable equilibrium can exist that perpetuates the two  
95 overdominant alleles indefinitely even within a fully self-fertilizing population. Consider  
96 a scenario in which two haplotypes, noted H1 and H2, occur within a diploid population  
97 self-fertilizing at rate  $\sigma$ . Each homozygote suffers a fitness reduction ( $s_1$  or  $s_2$ ) compared  
98 to the heterozygote fitness. In the case of true overdominance, Kimura and Ohta (1971)  
99 showed that a stable polymorphism will persist at an overdominant locus when:

$$\sigma < \frac{2s_x(1 - s_x)}{s_1 + s_2 - 2s_1s_2}. \quad (1)$$

100 where  $s_x = \min(s_1, s_2) < 0.5$ . When both segregating homozygotes reduce fitness by at  
101 least half ( $s_1, s_2 > 0.5$ ), selection acts to maintain overdominance even as the selfing  
102 rate approaches one, as selection removes homozygotes faster than they are generated  
103 (Rocheleau and Lessard, 2000). For situations with stable polymorphism, setting  $s_1 = s_2$

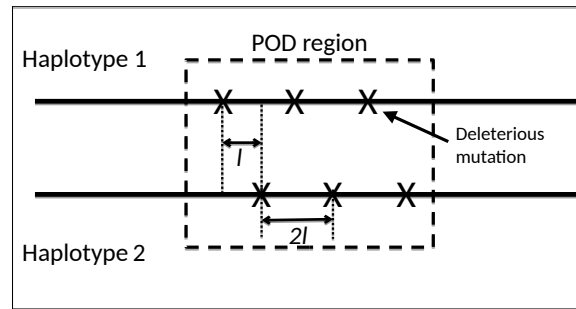

Figure 1: Genetic structure of the POD region (delimited by the dashed box). Deleterious mutations (represented by crosses) linked in cis occur at a distance  $2\ell$  M from each other along the same chromosome, alternating (at a distance  $\ell$  M) with trans mutations on the opposite chromosome. Close, regular, and alternating spacing of recessive deleterious mutations along both haplotypes ensure linkage and pseudo-overdominance.

104 results in both alleles being maintained at a frequency of 0.5.

105 We use this threshold under true overdominance to estimate the number of load  
 106 loci within pseudo-overdominant (POD) zone required to generate the necessary level  
 107 of overdominance needed to maintain a stable equilibrium (see Eq. 1). For the sake  
 108 of simplicity, we assume that each haplotype carries the same number  $n_L$  of deleterious  
 109 mutations all with the same coefficient of selection  $s$  and dominance  $h$ . We assume initial  
 110 complete linkage, as it can then be broken by recombination, with loci evenly spaced,  
 111 occurring at intervals of  $\ell$  Morgans between alternating trans-mutations on opposing  
 112 haplotypes (Fig. 1). As fitness effects are considered multiplicative across loci, an  
 113 individual's fitness is:

$$W = (1 - hs)^{he} (1 - s)^{ho} \quad (2)$$

114 where  $he$  and  $ho$  are the number of heterozygous and homozygous mutations, respec-  
 115 tively, carried by the individual. In the case of complete linkage homozygosity at these  
 116 loci only occurs in individuals carrying two copies of the same haplotype (genotype  $H_1H_1$   
 117 or  $H_2H_2$ ). As both haplotypes carry the same number of mutations, the coefficient of  
 118 selection acting against either homozygote ( $s_H = s_1, s_2$ ), relative to the fitness of the

119 heterozygote  $H_1H_2$  ( $W_{AA}/W_{Aa}$ ) is:

$$s_H = 1 - \frac{(1-s)^n}{(1-hs)^{2n}}. \quad (3)$$

120 This expression allows us to determine the number of deleterious alleles per haplotype  
121 necessary to sustain enough overdominance to preserve both haplotypes via stable bal-  
122 ancing selection (see Supp. File 1):

$$n_L = \frac{\log(1-s_H)}{\log(1-s) - 2\log(1-hs)} \quad (4)$$

123 As expected, the number of loci required to obtain a strength of selection against ho-  
124 mozygotes  $s_H$  decreases for higher values of  $s$  and  $h$ . For  $s = 0.01$  and  $h = 0.2$ ,  $n_L = 115$   
125 for  $s_H$  to be at least 0.5, which should sustain POD selection indefinitely (Supp. File 1,  
126 Fig. S1).

## 127 2.2 Inbreeding depression

128 Inbreeding depression  $\delta$  is a population specific variable, reflecting the number of het-  
129 erozygotes maintained in a population. The general equation used to estimate inbreeding  
130 depression is:

$$\delta = 1 - \frac{W_s}{W_o} \quad (5)$$

131 where  $W_s$  is the fitness of selfed offspring and  $W_o$  that of outcrossed offspring (Charlesworth  
132 and Charlesworth, 1987). If there is a POD zone, we can consider that there are two  
133 potential forms of selection contributing to inbreeding depression: 1) selection against  
134 deleterious mutations that are scattered throughout the genome (noted  $\delta_s$ ) and 2) over-  
135 dominant selection generated by POD zones (noted  $\delta_{od}$ ). If we assume that selection  
136 against deleterious mutations elsewhere in the genome and overdominant selection do  
137 not interfere with one another (*i.e.* no associative overdominance or effects of back-  
138 ground selection) and fitness effects remain multiplicative (see for example Kirkpatrick  
139 and Jarne 2000, the upper limit of the expected level of inbreeding depression will be:

$$\delta = 1 - (1 - \delta_{od})(1 - \delta_s). \quad (6)$$

140 When mutations are deleterious, and accounting for drift,  $\delta_s$  depends on the haploid  
 141 mutation rate  $U$ , the coefficient of selection  $s$  and the dominance of mutations  $h$  (see  
 142 equation 3 from Bataillon and Kirkpatrick 2000):

$$\delta_s = 1 - \exp \left[ -U \left( \frac{(1-2h)(1+F)}{2(h+F-hF)} - \frac{(1-2h)(1+F)(1-2hs)}{8(h+F-hF)^2 s N} \right) \right], \quad (7)$$

143 where  $F = \sigma/(2-\sigma)$  is the equilibrium inbreeding coefficient (expected deviation from  
 144 Hardy-Weinberg equilibrium of genotype frequencies). Though this expression for  $F$  re-  
 145 mains true for weak overdominance (Glémin, 2021), when there is strong overdominance,  
 146 the inbreeding coefficient depends on the coefficients of selection and allelic frequencies  
 147 (Appendix A4 from Kimura and Ohta, 1971). In our case with symmetrical selection  
 148 against homozygotes, this term is given as:

$$\hat{F} = \frac{2 - s_H - \sigma + s_H \sigma - \sqrt{(2 - s_H)^2 - 2(2 - s_H - s_H^2)\sigma + (1 - s_H)^2 \sigma^2}}{2s_H}. \quad (8)$$

149  $\hat{F}$  will tend to zero with increasing  $s_H$  (see Fig. A1 in Supp. File 1). Selfing populations  
 150 subject to strong overdominant selection thus tend to behave like outcrossing ones as  
 151 low fitness homozygotes are eliminated. In the presence of POD selection, we set  $F$  in  
 152 Eq. 7 to  $\hat{F}$ .

153 At equilibrium, the contribution of POD to inbreeding depression  $\delta_{od}$  can, for sym-  
 154 metrical overdominance, be written as:

$$\delta_{od} = \frac{(1 + \hat{F})i}{2 - s_H} \quad (9)$$

155 where  $i = \frac{s_1 s_2}{s_1 + s_2}$ , which simplifies to  $i = \frac{s_H}{2}$  when  $s_1 = s_2 = s_H$  - see Eq. A2 from Supp.  
 156 File 1 and Kimura and Ohta (1971). We provide the general expressions for  $\hat{F}$  and  $\delta_{od}$   
 157 in Supp. File 1 (see Eq. A3).

158 As previously shown,  $\delta_{od}$  increases with the selfing rate  $\sigma$  for strong overdominant  
 159 selection and  $\delta_s$  decreases with  $\sigma$  (Charlesworth and Charlesworth, 1987, 1990). It is  
 160 therefore possible to have similar  $\delta$  (given in Eq. 6) in outcrossers and selfers, depending  
 161 on the rates of background mutation  $U$  and the strength of POD selection (*i.e.* the value  
 162 of  $s_H$ ).



## 163 2.3 Recombination and POD's

164 Thus far, we have assumed complete linkage in order to apply one-locus overdominance  
 165 theory to infer the strength of selection against homozygotes necessary to sustain a stable  
 166 equilibrium. However, some recombination will occur, allowing the strong linkage dise-  
 167 quilibrium among loci within a POD to erode over time. In order to examine the effect  
 168 of recombination on the stability of POD, we propose a system of Ordinary Difference  
 169 Equations (ODEs) representing the change in frequencies of the two initial haplotypes  
 170 ( $\Delta_{P_1}$  and  $\Delta_{P_2}$ ) and that of a newly introduced recombinant haplotype ( $\Delta_{P_c}$ ):

$$\begin{aligned}\Delta_{P_1} &= \frac{P_1((1 - \hat{F})(1 - s_{c,1})P_c + (1 - s_H)((1 - \hat{F})P_1 + \hat{F}) + (1 - \hat{F})P_2) - P_1\bar{W}}{\bar{W}} \\ \Delta_{P_2} &= \frac{P_2((1 - \hat{F})(1 - s_{c,2})P_c + (1 - s_H)((1 - \hat{F})P_2 + \hat{F}) + (1 - \hat{F})P_1) - P_2\bar{W}}{\bar{W}} \\ \Delta_{P_c} &= \frac{P_c((1 - \hat{F})(1 - s_{c,1})P_1 + (1 - s_c)((1 - \hat{F})P_c + \hat{F}) + (1 - \hat{F})(1 - s_{c,2})P_2) - P_c\bar{W}}{\bar{W}}.\end{aligned}\tag{10}$$

171 The mean fitness of the population  $\bar{W}$  is the sum of the expected genotypic frequencies  
 172 after selection (see Supp. File 2, Eq. (A4)), and  $s_c$ ,  $s_{c,1}$  and  $s_{c,2}$  are the coefficients of se-  
 173 lection associated respectively with haplotypes  $H_cH_c$ ,  $H_cH_1$  and  $H_cH_2$ . We resolve this  
 174 system of equations to determine the conditions necessary for a recombinant haplotype  
 175  $H_c$  to increase in frequency ( $\Delta_{P_c} > 0$ ).

## 176 3 Simulations

177 So as to confirm expectations from the analytical model given above and explore the  
 178 dynamics of POD selection, we develop an individual-based simulation program in C++,  
 179 uploaded to Zenodo.org (Abu Awad and Waller, 2022). We consider a scenario where  
 180 POD selection arises after an admixture event between two initially isolated populations  
 181 fixed for different mutations within the same genomic region (a "proto-POD" zone).  
 182 Each population is made up of  $N$  sexual diploid individuals, self-fertilizing at a fixed rate,  
 183  $\sigma$ . Each individual is represented by two vectors, each carrying the positions (between 0  
 184 and 1) of deleterious mutations along a single chromosome with map length  $R$  Morgans.

185 Recombination occurs uniformly throughout the genome. Mutations within and outside  
186 of the POD zone have a fixed effect, with respective coefficients of selection,  $s$  and  $s_d$ , and  
187 dominances,  $h$  and  $h_d$ . Individual fitness is calculated as shown in Eq. 2. New mutations  
188 are sampled from a Poisson distribution with parameter  $U$ , the haploid mutation rate  
189 and their positions are uniformly distributed along the genome (infinite-locus model).  
190 Generations are discrete (no overlap) and consist of three phases: *i*) introducing new  
191 mutations, *ii*) selection, and *iii*) recombination and gamete production.

### 192 3.1 POD zone architecture and initiation

193 Two types of simulation are run, one with an arbitrary ideal haplotype structure expected  
194 to favour POD persistence and one with a more realistic distribution of mutations within  
195 the POD zone. The former consists of constructing two perfectly complementary hap-  
196 lotypes,  $H_1$  and  $H_2$ . Cis-mutations occur at regular intervals (every  $2\ell$  M) along each  
197 haplotype and mutations are staggered, spreading the load evenly through the POD  
198 and ensuring pseudo-overdominance (Fig. 1). The expected number of recombination  
199 events occurring between two trans-mutations is then  $\ell$ . The second type of POD zone  
200 architecture is one with randomly placed mutations in a predefined genomic region, their  
201 positions sampled from a uniform distribution, while ensuring that a locus with the same  
202 position is not sampled for both haplotypes. In both cases the center of the POD zone  
203 is kept constant for both haplotypes and the size of the POD zone is  $2\ell n_L$  M, with  $n_L$   
204 potentially different for each haplotype. The POD zone is arbitrarily positioned around  
205 the center of the genome, its exact center at position 0.5 along the chromosome.

206 After a burn-in period of 4 000 generations, allowing the two source populations  
207 (each fixed for a given haplotype in the proto-POD zone) to reach mutation-selection-  
208 drift equilibrium, a new population of size  $N$  is created by randomly sampling individuals  
209 from both populations. We arbitrarily consider that each source population contributes  
210 50% of individuals to the new population. The new population is then allowed to evolve  
211 for a further 4000 generations. Samples of 100 individuals are taken every 10 generations  
212 to estimate inbreeding depression, which we compare to the theoretical expectations

213 presented above (Eqs. 7, 9 and 6). We also use these samples to estimate heterozygosity  
214 within and outside the POD zone (POD  $H_e$  and genome  $H_e$ , respectively) as:

$$H_e = \sum_{j=1}^{100} \frac{he_j}{L}. \quad (11)$$

215 where  $he_i$  is the number of heterozygous mutations carried by individual  $j$  (out of a  
216 sample of 100) and  $L$  is the total number of segregating sites in the genomic region of  
217 interest. A decrease of  $H_e$  with time signals the erosion of the POD zone, either through  
218 loss or fixations of mutations.

219 Unless stated otherwise, all variable plotted are values obtained 4000 generations after  
220 the hybridisation event. Figures are made using the ggplot2 package (v3.3.6, Wickham  
221 2016), with, in most cases, lines generated using the geom\_smooth option. When this  
222 gave results that were too divergent compared to plotting the mean, the mean was used.

### 223 3.2 Simulations run

224 Simulations are run for population size  $N = 100, 1000$  and  $5000$  and for selfing rates  $\sigma$   
225 between  $0$  and  $0.95$ . The haploid background mutation  $U$  is set to  $0, 0.1$  and  $0.5$ , with new  
226 mutations outside the POD zone having a fixed coefficient of selection ( $s_d = 0.01$ ) and  
227 dominance ( $h_d = 0.2$  or  $0.5$ ). We explore the effect of genome map length  $R$ , choosing  
228  $R = 1$  and  $10$  Morgans for tight and loose linkage respectively, and we examine different  
229 strengths of linkage between loci in the POD zone, with  $\ell = 10^{-4}, 10^{-5}$  and  $10^{-6}$ . We  
230 consider both weak and strong selection against homozygotes, setting  $s_H$  to  $s_H = 0.14,$   
231  $0.26$  and  $0.45$ . These correspond to stable (polymorphic) overdominant selection when  
232  $\sigma = 0, 0.5$  or even (with a narrow range of stability)  $0.95$  (Fig. A2, dotted lines). To  
233 determine the effects of POD selection on heterozygosity elsewhere in the genome, we  
234 also run simulations where all alleles within the initial POD zone are neutral for all  
235 parameter sets mentioned above (achieved by setting  $s$  and  $h = 0$  within the POD). We  
236 run 100 repetitions for each parameter set.

## 4 Results

### 4.1 POD persistence and degradation

We first examine how recombination, the strength of selection against linked load loci, and their arrangement within the POD zone, influence POD persistence.

#### 4.1.1 Recombination and POD degradation

Under the assumption that recombination within the POD block is rare (reflecting tight linkage), any new haplotype  $H_c$  will be generated by a single recombination event. This is reflected in the ODEs introduced in Eq. (10) which compute changes in frequency of the two initial haplotypes ( $H_1$  and  $H_2$ ) and a recombinant ( $H_c$ ). For simplicity, we initially assume an ideal case where mutations are arranged alternately within the POD zone (see Fig 1). Positions of deleterious alleles in  $H_1H_2$  heterozygotes alternate in trans relative to flanking mutations on the same chromosome (Fig. 1). Each haplotype carries  $n_L$  deleterious mutations. Consider two cases: 1) the recombinant haplotype  $H_c$  (and its complement) each carry  $n_L$  deleterious mutations; 2)  $H_c$  carries  $n_L - 1$  mutations because recombination has cleaved one from one end of the POD zone.

Given arbitrary values of  $s_c$ ,  $s_{c,1}$  and  $s_{c,2}$  (the coefficients of selection against  $H_cH_c$ ,  $H_cH_1$  and  $H_cH_2$  genotypes, respectively), the only possible equilibria involve fixing one of the three haplotypes or maintaining only two of them. Hence any rare haplotype,  $H_c$ , should either be lost, go to fixation, or replace one of the initial haplotypes (co-existing with the other). For  $H_c$  to increase in frequency,  $\Delta_{P_c}$  (Eq. (10)) must be positive when it enters the population (or it would be eliminated). Assuming the frequency of a recombinant  $P_c$  is of order  $\epsilon$  ( $\epsilon$  being very small), the expression for  $\Delta_{P_c}$  for the leading order of  $P_c$  (noted  $\bar{\Delta}_{P_c}$ ) can be derived. In a population at equilibrium with  $P_1 = P_2 = (1 - \epsilon)/2$  and setting  $s_1 = s_2 = s_H$ :

$$\bar{\Delta}_{P_c} = \frac{2((1 + \hat{F})s_H - s_{c,1} - s_{c,2} - \hat{F}(2s_c - s_{c,1} - s_{c,2}))}{2 - s_H - \hat{F}s_H}. \quad (12)$$

The denominator of this expression is always greater than 0 for  $s_H < 1$ . To understand

262 the behavior of  $\bar{\Delta}_{P_c}$ , we simplify the above equation by setting  $\hat{F}$  to 0 (no self-fertilisation  
263 or very strong overdominant selection with  $s_H \approx 1$ , see Supp Fig. A1). In this case Eq.  
264 12 simplifies to  $2(s_H - s_{c,1} - s_{c,2})/(2 - s_H)$ . If no mutations have been cleaved off by  
265 recombination (*i.e.*  $H_c$  carries  $n_L$  mutations), the numerator  $2(s_H - s_{c,1} - s_{c,2}) \leq 0$  (see  
266 Eq. B1 in Supp. File 2 for expressions of  $s_{c,1}$  and  $s_{c,2}$ ) making  $\bar{\Delta}_{P_c}$  negative (Fig. B2  
267 in Supp. File 2). Hence  $H_c$  haplotypes will be selected against. This is because recom-  
268 binant  $H_c$  haplotypes will share mutations with both the initial  $H_1$  and  $H_2$  haplotypes  
269 and a proportion of loci in  $H_cH_1$  and  $H_cH_2$  genotypes will inevitably be homozygous,  
270 resulting in a lower fitness of these genotypes compared to  $H_1H_2$  heterozygotes. In this  
271 case neither the homozygous nor heterozygous genotypes with a recombinant haplotype  
272 present a selective advantage. If instead  $H_c$  carries  $n_L - 1$  mutations, the resulting co-  
273 efficients of selection (Eq. B2, Supp. File 2) lead to a positive  $\bar{\Delta}_{P_c}$  (the numerator in  
274 this case can be positive). The larger  $\hat{F}$  (or the selfing rate  $\sigma$ ) the more positive the  
275 resulting  $\bar{\Delta}_{P_c}$ .

276 This result leads us to predict that if a POD is initially stable, its eventual loss will  
277 usually occur gradually as recombination events near the distal ends of the POD cleave  
278 off mutations creating haplotypes with improved relative fitness. The reduced zones of  
279 stable equilibria for  $s_c = s_H$  in selfing populations (Fig. A2, in Supp. File 1) means that  
280 selection will more easily act to destabilise the POD zone by eroding mutations. This  
281 should fix one of the original haplotypes or a recombinant with the strength of selection  
282 affecting the rate at which this occurs.

283 Using simulations, we confirm results from single locus overdominance that stronger  
284 selection is more likely to result in stable polymorphism even for high selfing rates  
285 (Supp. Fig. S2). Drift and selection can both act to erode POD (shown by the rate of  
286 decrease of heterozygosity in Supp. Fig. S2). Strong drift renders selection neutral when  
287  $N_e s_H \ll 1$ , accelerating the loss of supposedly stable POD selection ( $N = 100$  in Supp  
288 Fig. S2). Increasing the efficacy of selection will also favour the loss of POD selection,  
289 but unlike for strong drift, this is due to a more efficient purging (and higher effective  
290 recombination rate) of loci contributing to POD selection ( $N = 5000$  in Supp Fig. S2).

291 As the differences between population sizes are quantitative, and  $s_H$  is a good predictor  
292 of mid/long-term stability of POD zones, in the following, we examine simulations only  
293 for  $N = 1000$ , for which both drift and selection act on POD stability, and  $s_H = 0.45$ ,  
294 for which overdominant selection is stable for all self-fertilisation rates simulated.

#### 295 4.1.2 Effect of the strength of selection against individual loci

296 As mutations are progressively lost from POD zones, recombinants can go to fixation.  
297 This will eventually destabilize the POD zone. We next assess how varying the coeffi-  
298 cients of selection  $s$  and dominance  $h$  against individual loci affects POD persistence.  
299 For a fixed value of selection against homozygotes,  $s_H$ , varying  $s$ ,  $h$  and  $n_L$  (obtained  
300 using Eq. (4)), we calculate the expected increase in frequency a recombinant haplotype  
301  $\bar{\Delta}_{P_c}$  using Eq. (12). If no mutation is lost ( $H_c$  also carries  $n_L$  mutations),  $\bar{\Delta}_{P_c}$  remains  
302 negative except under high rates of self-fertilisation when they can be positive (though  
303 close to 0). However, a mutation lost through recombination generates a positive  $\bar{\Delta}_{P_c}$   
304 that increases with increasing strengths of selection and dominance of the mutations for  
305 all rates of self-fertilisation (Figs. 2 a and b for  $s_H = 0.45$ ). We confirm this prediction  
306 via simulations. These show that most losses of diversity (fixation or loss of mutations)  
307 occur at the ends of the POD zone (Figs.2c and d for selfing rate  $\sigma = 0.95$ ). Losses of  
308 diversity within the POD zone intensify as  $s$  and  $h$  increase.

309 Stronger selection against individual mutations sustains heterozygosity more effec-  
310 tively as fewer mutations suffice to generate the same amount of balancing selection.  
311 However, the loss of a stronger mutation as a result of recombination will more likely  
312 unbalance and destabilise the POD zone. This accelerates the fixation or loss of muta-  
313 tions (Fig.2c). Increasing the dominance of load loci has similar effects as increasing  $s$   
314 but requires more mutations to reach the same  $s_H$  (*i.e.*  $n_L = 60$  and  $150$  for  $h = 0$  and  
315  $0.3$  respectively, Fig. 2f). This is because increased dominance increases the relative  
316 fitness of both the fitter homozygote (*i.e.* the haplotype with one less mutation due to  
317 recombination) and the heterozygote, increasing the overall fitness advantage of losing a  
318 mutation. The same patterns are observed in outcrossing populations to a lesser extent

319 (Supp. Fig. S3). Increased linkage within the POD zone reduces the rate at which these  
320 higher fitness recombinants occur, slowing this process (dashed lines, Figs. 2e and f; see  
321 Supp. Fig. S4 for patterns of mutation loss within the POD zone).

### 322 4.1.3 POD region architecture

323 So far, we have considered only an ideal genetic architecture that favours maintaining  
324 POD, namely homozygotes of both haplotypes having identical fitness disadvantages  
325 relative to the heterozygote and equally spaced cis and trans mutations within the POD  
326 zone. We now relax these assumptions by considering initial haplotypes carrying different  
327 numbers of mutations,  $n_L$ , within the POD region (while maintaining equal spacing) and  
328 then by placing randomly spaced mutations within the POD zone.

329 To unbalance the segregating homozygotes, consider alternative POD zone haplo-  
330 types with  $n_L = 80, 100, \text{ or } 120$  mutations paired with a haplotype  $H_1$  with  $n_L = 100$   
331 mutations (denoted by relative lengths of 0.8 1 and 1.2 respectively in Figs. 3a and  
332 c). These generate substantial fitness differentials with relative selection coefficients  
333 against homozygotes  $s_1 = 0.47$  and  $s_2 = 0.35$  (blue lines),  $s_1 = s_2 = 0.45$  (black lines),  
334 or  $s_1 = 0.43$  and  $s_2 = 0.53$  (green lines). In outcrossing populations, selection trims  
335 down longer, more loaded haplotypes as recombination makes variants available. This  
336 shrinks more loaded haplotypes to sizes close to the smaller haplotype (Fig. 3a, solid  
337 lines). Overdominant selection, however, sustains the core POD region's heterozygosity,  
338  $H_e$  (Fig. 3b, solid lines). Self-fertilising populations, in contrast, show less POD zone sta-  
339 bility under asymmetric selection despite the fact that populations with balanced loads  
340 showed only slight observed losses or fixations of mutations (dashed black lines in Figs.  
341 3a and c). When the alternative haplotype has less load (a relative size of 0.8), it quickly  
342 goes to fixation (dashed blue lines in Figs. 3a and c). This result matches the theoretical  
343 expectation that no overdominant polymorphism can be maintained with these coeffi-  
344 cients of selection against homozygotes when the selfing rate is 0.95 (see Fig.A2 in the  
345 Supp. File 1). When the total load of the second haplotype increases to a relative size of  
346 1.2, the POD zone is more commonly sustained as mutations are trimmed off the ends of

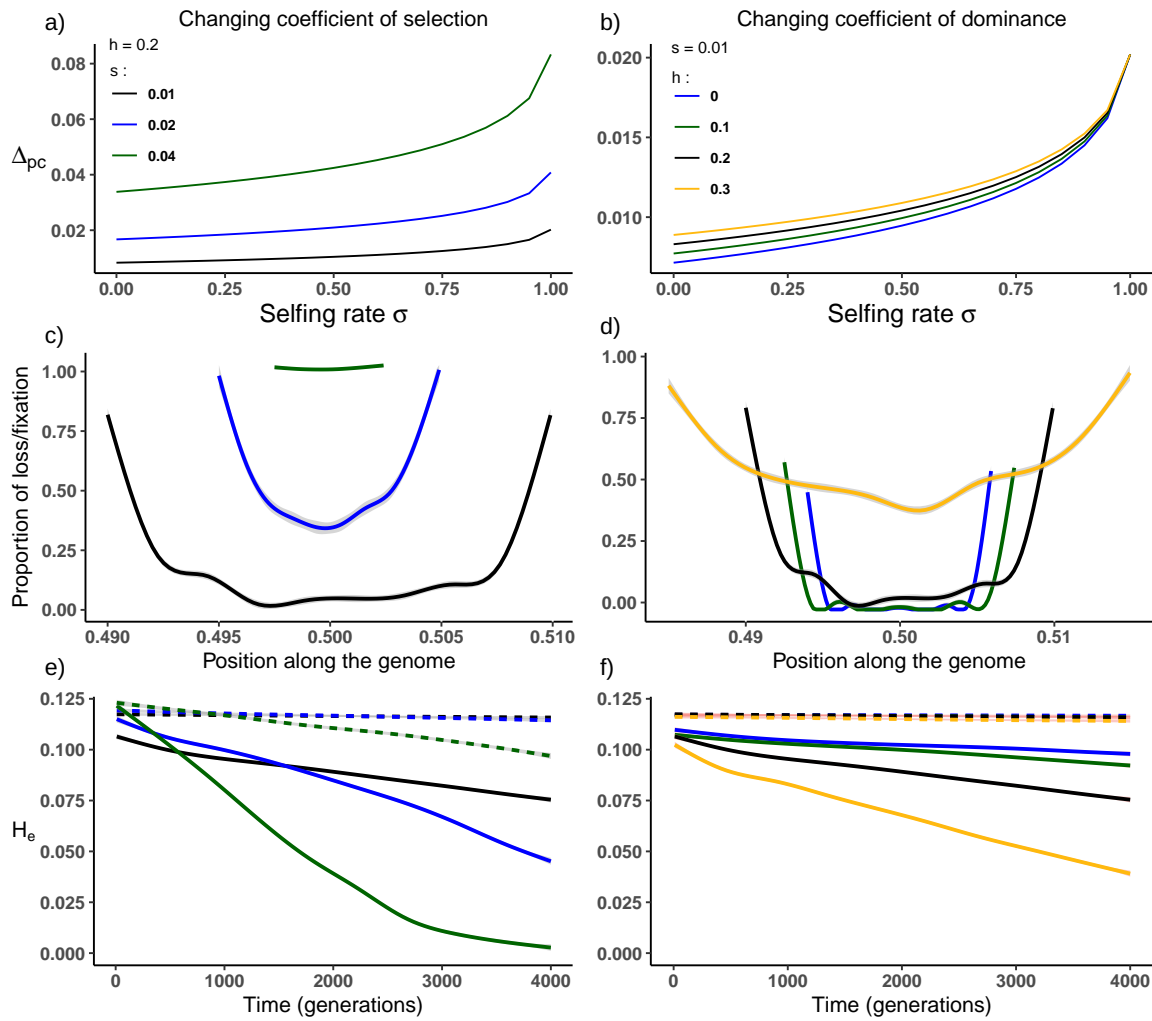

Figure 2: Effects of levels of selection and dominance on selection dynamics within a POD zone. Left panels show the effects of varying the coefficient of selection at a load locus  $s$  ( $s = 0.01, 0.02$  and  $0.04$ , corresponding to  $n_L = 100, 50$  and  $25$  loci). Dominance is fixed at  $h = 0.2$  and  $s_H = 0.45$ . Right panels show the effects of varying dominance ( $h = 0, 0.1, 0.2$  and  $0.5$  with  $n_L = 60, 75, 100$  and  $150$ ) with selection fixed at  $s = 0.01$ . Panels a) and b) show theoretical rates of increase in frequency for a recombinant haplotype that loses a mutation from one end. Panels c) and d) show observed frequencies of fixation/loss along the POD zone at generation 4000 (x values represent the position of the loci along the chromosome). The selfing rate  $\sigma = 0.95$  and linkage  $\ell = 10^{-4}M$ . Panels e) and f) show losses in heterozygosity ( $H_e$ ) over time in populations with a high selfing rate ( $\sigma = 0.95$ ) and either loose linkage ( $\ell = 10^{-4}M$ , solid lines) or tight linkage ( $\ell = 10^{-5}M$ , dashed lines). Population size  $N = 1000$ .



347 the POD zone (Fig. 3a, c). This difference in behavior reflects the need for segregating  
348 load to exceed a threshold to sustain a POD zone. As for outcrossing, most mutations  
349 of the larger haplotype will be trimmed off the edges, but there is some fixation and/or  
350 loss of mutations along the whole POD region (dashed green line in Fig. 3a), lowering  
351 the mean observed  $H_e$  (dashed green line in Fig. 3c). This is most probably due to  
352 a larger range of recombinants having a higher selective advantage, provided that they  
353 trim the larger haplotype and thus help destabilize POD selection.

354 When the mutations are not in an ideal configuration, but randomly positioned  
355 throughout the designated POD zone, stability of the POD zone is barely affected in  
356 outcrossing populations (solid lines in Figs. 3b and d), even when the haplotypes are  
357 initially uneven. Selfing populations, however, require stronger linkage to retain the  
358 POD zone (compare dashed lines in Fig. 3 for  $\ell = 10^{-6}$  M to Fig. S5 for  $\ell = 10^{-5}$ ).  
359 Despite more frequent fixations/losses of mutations, some heterozygosity nonetheless  
360 persists for approximately 1000 generations even with lower linkage (Supp. Fig. S5).

## 361 4.2 Background mutations

362 Mutations introduced elsewhere in the genome influence POD selection dynamics and  
363 persistence and vice versa as POD's affect purifying selection across the genome. In  
364 general, when a POD zone is stable, background mutations will not destabilise it. Back-  
365 ground selection does, however, affect heterozygosity within and outside the POD zone.  
366 Let us compare heterozygosity within the POD zone in simulations with background  
367 mutations to simulations lacking it (*i.e.*  $U > 0$  vs.  $U = 0$ ; Fig. 4a). Interestingly,  
368 in self-fertilising populations,  $H_e$  within the POD zone rises when background selection  
369 occurs elsewhere in the genome. These effects increase when mutation rates rise (green  
370 *vs.* blue lines,  $U = 0.5$  and  $0.1$  respectively) and linkage increases (full *vs.* dashed lines  
371 reflecting map lengths of  $R = 1$  and 10 Morgans respectively).

372 Similarly, the presence of a stable POD zone affects the heterozygosity of deleterious  
373 mutations observed elsewhere in the genome. When mutation rates are low ( $U = 0.1$ ),  
374 POD selection slightly decreases the mutational heterozygosity elsewhere in the genome

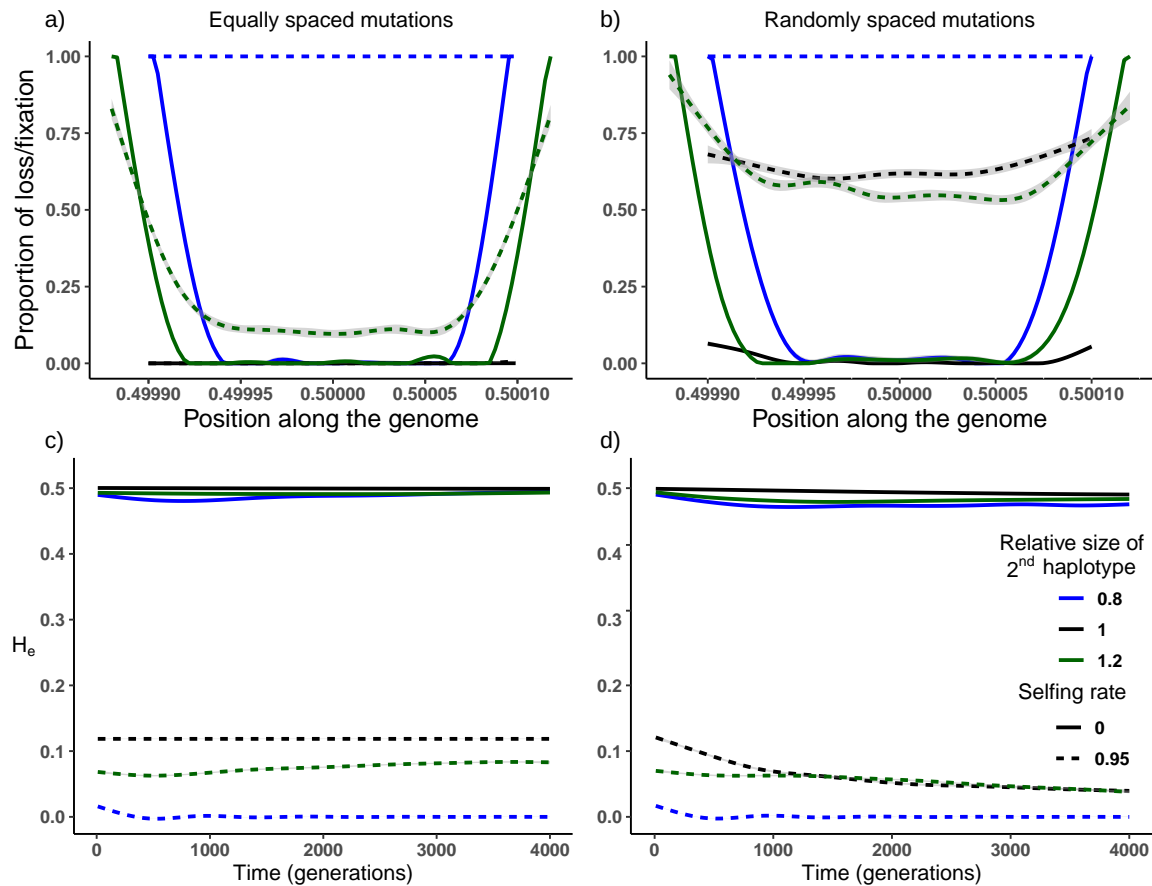

Figure 3: Effects of relaxing the assumptions of symmetric overdominance and evenly spaced mutations. Upper panels show locations within the POD zone where load mutations are most likely to be lost (a, b) and how this depends on whether mutations are evenly spaced (a) or randomly distributed (b). Results are shown for both symmetric (black) and asymmetric (green and blue) loads. Outcomes under both outcrossing and high selfing (solid vs. dotted lines) are shown. Note erosion of mutations via recombination and selection at both ends of the POD zone. Lower panels show overall stability of the POD zone (shown as heterozygosity,  $H_e$ ) over time. As in the upper panels, graphs show results for both symmetric (black) and asymmetric (green and blue) loads and for evenly and randomly placed mutations (panel c vs. d). The coefficients of selection and dominance are  $s = 0.01$  and  $h = 0.2$  respectively, linkage within the POD zone is  $\ell = 10^{-6}$  and population size  $N = 1000$ .

375 (blue lines Fig. 4b). Conversely, a higher genomic mutation rate ( $U = 0.5$ , green  
376 lines) results in increased heterozygosity, especially in highly selfing populations with  
377 small map lengths (implying tight linkage - solid green line in Fig. 4b). Effects of POD  
378 selection on effective population size are complex but in most cases, POD selection tends  
379 to decrease  $N_e$  (Supp. Fig. S6).

380 To confirm that these effects derive from overdominance rather than some other ef-  
381 fect of background selection, we simulated effects of co-dominant background mutations  
382 ( $h_d = 0.5$ ). Because such mutations are expressed in heterozygotes and thus easily  
383 removed by selection, they generate few associations with other loci. Co-dominant back-  
384 ground mutations have little effect on within-POD zone heterozygosity in contrast to  
385 simulations with more recessive mutations ( $h_d = 0.2$ ). This is true even within selfing  
386 populations (Supp. Fig. S7a). This confirms that it is associative overdominance be-  
387 tween the POD zone and other load loci that increases heterozygosity (Supp. Fig. S7b).  
388 Varying rates of background mutation and POD zone length also have complex effects  
389 on effective population size  $N_e$  (Supp. Fig. S7c).

### 390 4.3 Inbreeding depression

391 As expected, the overdominance generated in a POD zone increases the inbreeding de-  
392 pression,  $\delta$ , populations express (Supp. Fig. S8). Observed  $\delta$  in outcrossing populations  
393 can be predicted using Eq. (6), which accounts for overdominant selection and unlinked  
394 deleterious mutations. In selfing populations variable erosion of the POD zone and POD  
395 selection dynamics generate bimodal distributions of  $\delta$  (see Supp. Fig. S9 for clearer  
396 representations). Some simulations generate values of  $\delta$  close to those predicted by Eq.  
397 (6) (dashed lines in Fig. 5) while others generate values predicted when selection acts  
398 only against the unlinked recessive deleterious mutations (Eq. (7), dotted lines in Fig.  
399 5). This may reflect loss of the POD zone. Genomes with smaller map lengths (*e.g.*,  
400  $R = 1$  Morgans) generally increase the observed  $\delta$ , especially in selfing populations (see  
401 Supp. Figs. S8 and S10).

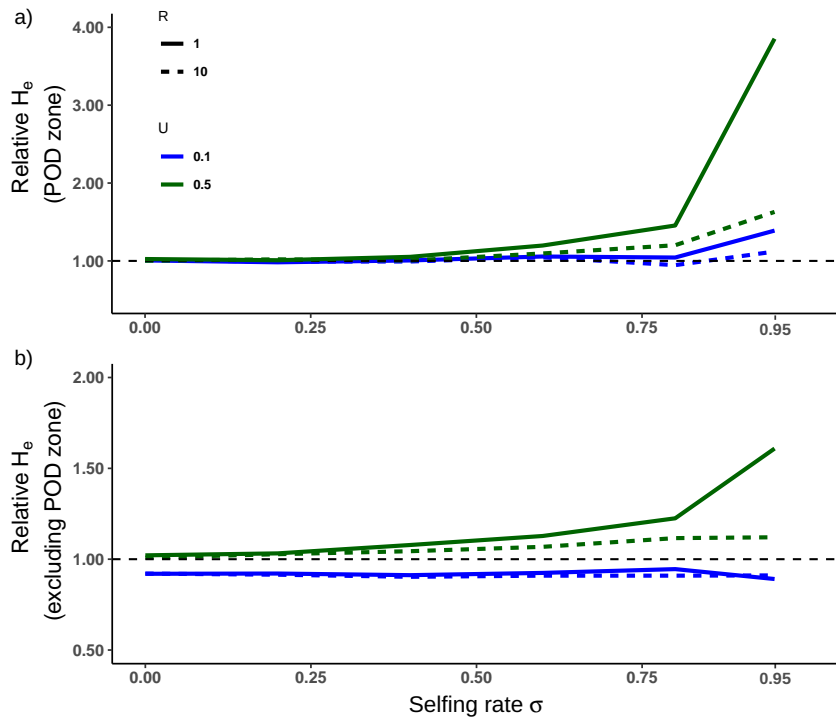

Figure 4: Background mutations affect POD selection and vice versa. Graph (a) shows heterozygosity,  $H_e$ , within the POD zone with background mutations relative to  $H_e$  in the absence of background mutations and graph (b)  $H_e$  elsewhere in the genome with a POD zone relative to without, both as a function of the selfing rate. Populations are subject to different background mutation rates ( $U$ ) and shorter and longer map lengths ( $R$  in Morgans). These simulations use 100 POD load loci ( $n_L = 100$ ) and a map length of  $\ell = 10^{-6}$  Morgans. Mutations within the POD zone are randomly placed. Selection coefficients in- and outside the POD zone ( $s$  and  $s_d$  respectively) are 0.01 with dominances  $h$  and  $h_d = 0.2$ .

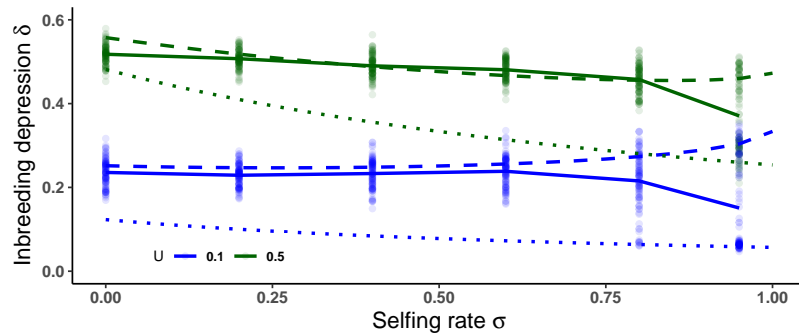

Figure 5: Inbreeding depression  $\delta$  as a function of the selfing rate for different values of the haploid mutation rate,  $U$ . Solid lines show means of the simulations run. Dotted lines show the inbreeding depression expected in the absence of overdominance (Eq. (7)) while dashed lines show increases in  $\delta$  expected with overdominant selection over all selfing rates (Eq. (6)). Other parameter values are  $n_L = 100$ ,  $\ell = 10^{-6}$  Morgans and randomly placed mutations in the POD zone. Selection coefficients in- and outside the POD zone,  $s$  and  $s_d$  are set to 0.01 with dominances  $h$  and  $h_d = 0.2$ . The total map length (setting the recombination rate) is  $R = 10$  Morgans.

## 5 Discussion

Given that purging, drift, and background selection all reduce segregating variation and thus inbreeding depression, we face the question of what force perpetuates these, even within small and inbred populations. Waller (2021) emphasized this enigma and reviewed mechanisms that might account for it. Selective interference among loci might act to slow or block purging (Lande and Schemske, 1985a; Winn et al, 2011). Recurrent mutations might also replenish the load fast enough to regenerate  $\delta$  (Fisher, 1930; Charlesworth, 2018). A third possibility is that clusters of recessive mutations linked in repulsion emerge, creating enough balancing selection via pseudo-overdominance (POD) to counter purging and drift, sustaining selection for outcrossing or mixed mating systems (Waller, 2021). Our goals here were to explore the dynamic stability of POD zones (initially ignoring how they arise) using both classical one-locus overdominant theory (Kimura and Ohta, 1971) and simulations. We found that strong and balanced POD zones can persist for hundreds to many thousands of generations.

Whether POD zones are fragile or robust depends critically on several genetic parameters. These include the number and severity of deleterious mutations, their proximity and cis-/trans- positions, and their levels of dominance/recessivity (Figs. 2 and S3). Strong and balanced selection plus tight linkage allow POD zones to persist as these conditions enhance the associations (linkage disequilibria) that generate POD effects. Recombination dissolves these associations, allowing purifying selection and drift to disrupt POD zones, purging and fixing mutations. Mutations erode from either end of the POD zone or the load becomes unbalanced enough to fix one haplotype. The importance of linkage and small mutational effects are evident in the radically enhanced purging seen in models that ignore linkage and assume major mutational effects (Lande and Schemske, 1985b). We also found that new recessive mutations that occur elsewhere in the genome generate associations with load alleles within POD zones that enhance POD zone heterozygosity and persistence (Fig. 4). Such mutations add to the segregating load, increasing heterozygote advantage. Because levels of heterozygosity are correlated across the genome in partially inbred populations (identity disequilibrium),

431 the background selection generated by mutations outside the POD zone tend to reinforce  
432 the balancing selection favoring heterozygotes in the POD zone. POD zones also exert  
433 reciprocal effects, enhancing the heterozygosity of mutations occurring elsewhere in the  
434 genome when mutation rates are moderate ( $U=0.5$ , Fig. 4b). This effect was amplified  
435 within selfing populations, presumably reflecting how selection against POD zone ho-  
436 mozygotes favors heterozygosity across the genome when more identity disequilibrium  
437 occurs. These effects would be further enhanced if mutations were to have varying dom-  
438 inance effects, a scenario which we did not consider here. However, recent work has  
439 shown that POD selection can be generated in a single population by the clustering of  
440 mutations in repulsion, even without heterogenous recombination rates along the chro-  
441 mosome (Sianta et al, 2021). These results coupled with ours lead us to hypothesize that  
442 any genomic region displaying reduced recombination could provide a haven for POD  
443 zones to emerge and persist.

## 444 5.1 How do POD zones originate?

445 Many empirical observations could be explained by the existence of POD zones (see  
446 Introduction and Waller 2021). Whether POD zones that are conserved across popula-  
447 tions exist in sufficient number and strength to affect evolutionary dynamics hinges on  
448 the relative rates at which they are created and destroyed. We focused on POD zone  
449 erosion and loss, not how they arise. As our results show, a requirement for POD stabil-  
450 ity is strong linkage within a given genomic region in which mutations can accumulate  
451 through the actions of selection and genetic drift. Inversions and centromeric regions  
452 with restricted recombination provide preconditions favoring POD zone emergence, as  
453 do genomic regions neighbouring loci currently or previously under overdominant se-  
454 lection, where recombination is suppressed. Examples where this has been observed  
455 include self-incompatibility loci (Takebayashi, 2003; Iqbal et al, 2008; Mable, 2008), MHC  
456 loci (Garrigan and Hedrick, 2003; Gemmill and Slate, 2006), and loci with balanced  
457 polymorphisms generated by ecological selection (van Oosterhout et al, 2000; Jay et al,  
458 2021). In such regions, mutations of small effect become effectively neutral when the

459 product of the effective population size and the selection coefficient  $N_e s \ll 1$  (Crow and  
460 Kimura, 1970; Hedrick et al, 2016)). These will drift in frequency and often fix increasing  
461 the “drift load” to the point where it may compromise population viability (Whitlock  
462 et al, 2000; Charlesworth, 2018). Selection against strongly deleterious mutations will  
463 accentuate fixation of milder mutations linked in repulsion via “background selection”  
464 (Charlesworth et al, 1997; Zhao and Charlesworth, 2016). Pairwise and higher asso-  
465 ciations (linkage disequilibria) also increase within small and inbred populations even  
466 among alleles at unlinked loci limiting selection (Hill and Robertson, 1966; Sved, 1971;  
467 Ohta and Cockerham, 1974; Lewontin, 1974).

468 The scenario we suggested that might create POD zones involved drift fixing alter-  
469 native sets of recessive deleterious mutations among isolated populations. When such  
470 populations hybridize, their F1 progeny experience high heterosis reflecting the cumula-  
471 tive effects of POD across the whole genome (Crow, 1999b). Under free recombination,  
472 this heterosis is expected to erode by 50% in the F2 and each subsequent generation  
473 as recombination dissipates the associations generating the POD (Harkness et al, 2019)  
474 (ignoring the presence of epistatic Dobzhansky-Muller incompatibilities -(Ehiobu et al,  
475 1989). However, where clumps of mutations occur within short genomic regions (or in  
476 low recombination zones), POD zones may be spawned. Inter-population crosses often  
477 reveal high heterosis (Willi et al, 2013; Spigler et al, 2017) as do crosses between low-  
478 fitness inbred lines in plant and animal breeding programs. Theory suggests that any  
479 incipient POD zone generating heterozygous progeny at least twice as fit as homozygous  
480 progeny will allow that POD zone to persist even in highly selfing populations. Dramatic  
481 examples of “hybrid vigor” in F1 crosses include cases where progeny have up to 35 times  
482 the fitness of parental lineages (Tallmon et al, 2004; Hedrick and Garcia-Dorado, 2016)  
483 easily satisfying this condition.

484 Proto-POD zones may be fragile. Our models show that recombination and selection  
485 eliminate proto-POD zones with weak, unbalanced, or loosely linked loads. However,  
486 in some regions, cumulative selective effects from localized mutations may be large and  
487 balanced enough to allow a persistent POD zone to emerge. Such zones eliminate many



488 homozygous progeny, reducing effective rates of inbreeding ( $\hat{F}$ , Eq. 8). This, in turn,  
489 reduces rates at which deleterious recessive mutations are lost both within POD zones  
490 and elsewhere in the genome (Fig. 4). Selection against low-fitness recombinants might  
491 even favor the evolution of reduced rates of recombination within POD zones providing  
492 another mechanism to stabilize POD zones (cf. Olito et al 2022). We ignore the potential  
493 of POD zones to gain strength over time by accumulating additional internal mutations  
494 sheltered from selection as heterozygotes, which would augment the overdominance as  
495 observed at the S-locus in *Arabidopsis halleri* – (Llaurens et al, 2009)).

## 496 5.2 Evolutionary consequences of POD selection

497 POD zones could affect the architecture and the dynamics of the genetic load in various  
498 ways. Most conspicuously, our simulations of background selection show how POD zones  
499 could increase the segregational load elsewhere in the genome and vice versa. Such  
500 effects imply that mutations both within and outside the POD zone could reinforce  
501 the selection maintaining POD zones sustaining more variability and segregating loads  
502 than otherwise expected. Such loads could favor self-incompatibility mechanisms for  
503 their ability to produce fewer low-fitness homozygous genotypes. Our scenario where  
504 population hybridization spawns POD zones suggests a mechanism whereby fixed drift  
505 loads might regularly be converted into segregating loads which then persist in regions  
506 expressing strong overdominance.

507 Although we expect positive heterozygosity-fitness correlations within partially in-  
508 bred populations (given that heterozygosity inversely measures inbreeding), heterozy-  
509 gosity and variation within POD zones reflects the opposite: non-adaptive variation  
510 emerging from sustained mutational and segregational genetic loads. This may help  
511 to explain why heterozygosity-fitness correlations can be weak and inconsistent (David,  
512 1998). POD zones might increase loads within populations by creating safe havens  
513 within which new deleterious mutations could accumulate while increasing the load of  
514 mutations segregating elsewhere in the genome. Small, inbred populations might also  
515 become vulnerable to “mutational meltdown” threatening population viability (Gabriel

516 et al, 1993). Conversely, POD zones may provide individual or population advantages  
517 by sustaining inbreeding depression and favoring outcrossing in ways that better sustain  
518 adaptive genetic variability.

### 519 5.3 POD effects on mating system evolution

520 The presence of POD conspicuously affects the evolution of plant and animal mating  
521 systems by sustaining more segregational load and higher inbreeding depression than  
522 expected especially in small, inbred populations. Early models of mating system evo-  
523 lution sought to explain variable levels of self-fertilization as equilibria reflecting how  
524 selection acted on progeny with more or less inbreeding depression. In these simple  
525 static models, inbreeding depression less than 0.5 would result in exclusive selfing while  
526 higher levels would favor exclusive outcrossing. More dynamic simple models that allow  
527 selection make mixed mating systems even more improbable by allowing inbreeding to  
528 purge deleterious mutations, generating "run-away" selection for ever-increasing levels  
529 of selfing (Lande and Schemske, 1985b). If drift instead fixes many segregating muta-  
530 tions, similar effects emerge as this, too, causes inbreeding depression to decline. The  
531 ability of many small, inbred populations to nevertheless retain genetic variation and  
532 inbreeding depression plus the absence of purely inbreeding taxa thus pose a paradox  
533 (Byers and Waller, 1999; Winn et al, 2011). More complex and realistic models that  
534 incorporate effects of linkage, drift, and the associations among loci that arise in small,  
535 inbred populations show far more complex dynamics (Charlesworth and Charlesworth,  
536 1987; Uyenoyama et al, 1993). One relevant model showed that a single unlinked over-  
537 dominant viability locus anywhere in the genome generates positive associations with  
538 modifier alleles enhancing outcrossing (Uyenoyama and Waller, 1991). Such associations  
539 favor a persistently mixed mating system. Because POD also favors heterozygotes, we  
540 expect POD zones to exert similar effects. The presence of POD zones might thus help  
541 to account for the paradoxes of persistent segregating loads and populations and species  
542 that maintain mixed mating systems. If, instead, POD zones regularly arise and then  
543 deteriorate, selection could alternately favor selfing and outcrossing. This might provide

544 an entirely different mechanism favoring mixed mating systems.

## 545 5.4 Conclusions

546 Understanding the mechanisms that create and sustain POD zones cast light on how  
547 commonly POD zones may arise and persist and the genetic and demographic circum-  
548 stances that enhance their longevity. Comparative genomic data will be particularly  
549 useful for searching for POD zones and analyzing their structure and history. Our mod-  
550 els demonstrate how several genetic, demographic, and mating system parameters may  
551 affect load dynamics within and beyond POD zones. Any POD zones that persist are  
552 likely to strongly affect mating system evolution by reducing both purifying selection  
553 and drift, sapping the power these forces would otherwise have to reduce inbreeding  
554 depression. Our models demonstrate that POD zones can persist given the right con-  
555 ditions. We encourage further research to extend and refine our understanding of this  
556 phenomenon.

## 557 6 Acknowledgements

558 We thank Sylvain Glémin, Lei Zhao, Yaniv Brandvain and an anonymous reviewer for  
559 useful comments. Diala Abu Awad was funded by the Alexander von Humboldt Stiftung.

## 560 Bibliography

- 561 Abu Awad D, Waller DM (2022) POD selection - individual based model. DOI  
562 10.5281/ZENODO.6874327, URL <https://zenodo.org/record/6874327>
- 563 Baldwin SJ, Schoen DJ (2019) Inbreeding depression is difficult to  
564 purge in self-incompatible populations of *Leavenworthia alabamica*.  
565 New Phytologist 224(3):1330–1338, DOI 10.1111/nph.15963, URL  
566 <https://onlinelibrary.wiley.com/doi/10.1111/nph.15963>
- 567 Bataillon T, Kirkpatrick M (2000) Inbreeding depression due to mildly deleterious mu-

568 tations in finite populations: size does matter. *Genetical Research* 75(1):75–81, DOI  
569 10.1017/S0016672399004048

570 Bernstein MR, Zdraljevic S, Andersen EC, Rockman MV (2019) Tightly  
571 linked antagonistic-effect loci underlie polygenic phenotypic variation in  
572 *C. elegans*. *Evolution Letters* 3(5):462–473, DOI 10.1002/evl3.139, URL  
573 <https://onlinelibrary.wiley.com/doi/10.1002/evl3.139>

574 Brandenburg JT, Mary-Huard T, Rigaiil G, Hearne SJ, Corti H, Joets J, Vitte C, Char-  
575 cosset A, Nicolas SD, Tenaillon MI (2017) Independent introductions and admixtures  
576 have contributed to adaptation of european maize and its american counterparts.  
577 *PLoS Genetics* 13(3), DOI 10.1371/journal.pgen.1006666

578 Brown KE, Kelly JK (2020) Severe inbreeding depression is predicted by the “rare allele  
579 load” in *Mimulus guttatus*. *Evolution* 74(3):587–596, DOI 10.1111/evo.13876, URL  
580 <https://onlinelibrary.wiley.com/doi/abs/10.1111/evo.13876>

581 Byers D, Waller D (1999) Do plant populations purge their genetic load? effects of pop-  
582 ulation size and mating history on inbreeding depression. *Annual Review of Ecology*  
583 *and Systematics* 30:479–513, DOI 10.1146/annurev.ecolsys.30.1.479

584 Charlesworth B (2018) Mutational load, inbreeding depression and heterosis in subdivi-  
585 ded populations. *Molecular Ecology* 27(24):4991–5003, DOI 10.1111/mec.14933

586 Charlesworth B, Nordborg M, Charlesworth D (1997) The effects of lo-  
587 cal selection, balanced polymorphism and background selection on  
588 equilibrium patterns of genetic diversity in subdivided populations.  
589 *Genetics Research* 70(2):155–174, DOI 10.1017/S0016672397002954,  
590 URL [https://www.cambridge.org/core/journals/genetics-](https://www.cambridge.org/core/journals/genetics-research/article/effects-of-local-selection-balanced-polymorphism-and-background-selection-on-equilibrium-patterns-of-genetic-diversity-in-subdivided-populations/1F946DDC83F5277DC964D76329A6BB66)  
591 [research/article/effects-of-local-selection-balanced-polymorphism-and-](https://www.cambridge.org/core/journals/genetics-research/article/effects-of-local-selection-balanced-polymorphism-and-background-selection-on-equilibrium-patterns-of-genetic-diversity-in-subdivided-populations/1F946DDC83F5277DC964D76329A6BB66)  
592 [background-selection-on-equilibrium-patterns-of-genetic-diversity-in-subdivided-](https://www.cambridge.org/core/journals/genetics-research/article/effects-of-local-selection-balanced-polymorphism-and-background-selection-on-equilibrium-patterns-of-genetic-diversity-in-subdivided-populations/1F946DDC83F5277DC964D76329A6BB66)  
593 [populations/1F946DDC83F5277DC964D76329A6BB66](https://www.cambridge.org/core/journals/genetics-research/article/effects-of-local-selection-balanced-polymorphism-and-background-selection-on-equilibrium-patterns-of-genetic-diversity-in-subdivided-populations/1F946DDC83F5277DC964D76329A6BB66)

- 594 Charlesworth D, Charlesworth B (1987) Inbreeding depression and its evolutionary con-  
595 sequences. *Annual Review of Ecology, Evolution, and Systematics* 18:237–268
- 596 Charlesworth D, Charlesworth B (1990) Inbreeding Depression with Heterozygote  
597 Advantage and Its Effect on Selection for Modifiers Changing the Outcross-  
598 ing Rate. *Evolution* 44(4):870–888, DOI 10.1111/j.1558-5646.1990.tb03811.x, URL  
599 <https://onlinelibrary.wiley.com/doi/abs/10.1111/j.1558-5646.1990.tb03811.x>
- 600 Chelo IM, Afonso B, Carvalho S, Theologidis I, Goy C, Pino-Querido  
601 A, Proulx SR, Teotónio H (2019) Partial Selfing Can Reduce Genetic  
602 Loads While Maintaining Diversity During Experimental Evolution. *G3*  
603 *Genes|Genomes|Genetics* 9(9):2811–2821, DOI 10.1534/g3.119.400239, URL  
604 <https://academic.oup.com/g3journal/article/9/9/2811/6026387>
- 605 Crow JF (1993) Mutation, mean fitness, and genetic load. *Oxford Series in Evol Biol*  
606 9:3–42
- 607 Crow JF (1999a) The Rise and Fall of Overdominance. In: *Plant Breeding Re-*  
608 *views*, John Wiley & Sons, Ltd, pp 225–257, DOI 10.1002/9780470650134.ch5, URL  
609 <https://onlinelibrary.wiley.com/doi/abs/10.1002/9780470650134.ch5>
- 610 Crow JF (1999b) The rise and fall of overdominance. *Plant Breeding Reviews* 17:225–257
- 611 Crow JF, Kimura M (1970) *An Introduction to Population Genetics Theory*. Burgess  
612 Pub. Co., 591 pp.
- 613 Darwin C (1876) *The effects of cross and self fertilization in the vegetable kingdom*. J.  
614 Murray and Co.
- 615 David P (1998) Heterozygosity–fitness correlations: new perspectives on old  
616 problems. *Heredity* 80(5):531–537, DOI 10.1046/j.1365-2540.1998.00393.x, URL  
617 <http://www.nature.com/doifinder/10.1046/j.1365-2540.1998.00393.x>
- 618 Ehiobu NG, Goddard ME, Taylor JF (1989) Effect of rate of inbreeding on inbreeding  
619 depression in *Drosophila melanogaster*. *Theoretical and Applied Genetics* 77(1):123–  
620 127, DOI 10.1007/BF00292326, URL <http://link.springer.com/10.1007/BF00292326>

- 621 Fisher S Ronald A (1930) *The Genetical Theory of Natural Selection*. Oxford University  
622 Press, Oxford
- 623 Gabriel W, Lynch M, Bürger R (1993) Muller's Ratchet and Mutational Melt-  
624 downs. *Evolution* 47(6):1744–1757, DOI 10.1111/j.1558-5646.1993.tb01266.x, URL  
625 <https://onlinelibrary.wiley.com/doi/abs/10.1111/j.1558-5646.1993.tb01266.x>
- 626 Garrigan D, Hedrick PW (2003) Perspective: Detecting Adaptive Molecular Polymor-  
627 phism: Lessons from the MHC. *Evolution* 57(8):1707–1722, DOI 10.1111/j.0014-  
628 3820.2003.tb00580.x, URL <https://onlinelibrary.wiley.com/doi/10.1111/j.0014-3820.2003.tb00580.x>
- 630 Gemmell NJ, Slate J (2006) Heterozygote Advantage for Fecun-  
631 dity. *PLoS ONE* 1(1):e125, DOI 10.1371/journal.pone.0000125, URL  
632 <https://dx.plos.org/10.1371/journal.pone.0000125>
- 633 Gilbert KJ, Pouyet F, Excoffier L, Peischl S (2020) Transition from Background Se-  
634 lection to Associative Overdominance Promotes Diversity in Regions of Low Re-  
635 combination. *Current Biology* 30(1):101–107.e3, DOI 10.1016/j.cub.2019.11.063, URL  
636 [https://www.cell.com/current-biology/abstract/S0960-9822\(19\)31565-9](https://www.cell.com/current-biology/abstract/S0960-9822(19)31565-9)
- 637 Glémin S (2021) Balancing selection in self-fertilizing popula-  
638 tions. *Evolution* 75(5):1011–1029, DOI 10.1111/evo.14194, URL  
639 <https://onlinelibrary.wiley.com/doi/10.1111/evo.14194>
- 640 Harkness A, Brandvain Y, Goldberg EE (2019) The evolutionary response of mat-  
641 ing system to heterosis. *Journal of Evolutionary Biology* 32(5):476–490, DOI  
642 10.1111/jeb.13430, URL <https://onlinelibrary.wiley.com/doi/10.1111/jeb.13430>
- 643 Hedrick PW, Garcia-Dorado A (2016) Understanding Inbreeding De-  
644 pression, Purging, and Genetic Rescue. *Trends in Ecology &*  
645 *Evolution* 31(12):940–952, DOI 10.1016/j.tree.2016.09.005, URL  
646 <https://linkinghub.elsevier.com/retrieve/pii/S0169534716301586>

- 647 Hedrick PW, Hellsten U, Grattapaglia D (2016) Examining the cause of high inbreeding  
648 depression: analysis of whole-genome sequence data in 28 selfed progeny of eucalyptus  
649 grandis. *New Phytologist* 209(2):600–611, DOI 10.1111/nph.13639
- 650 Hill WG, Robertson A (1966) The effect of linkage on limits to artificial selection. *Ge-*  
651 *netical Research* 89(5-6):311–336, DOI 10.1017/S001667230800949X
- 652 Iqic B, Lande R, Kohn J (2008) Loss of self-incompatibility and its evolutionary conse-  
653 quences. *International Journal of Plant Sciences* 169(1):93–104, DOI 10.1086/523362,  
654 URL <https://doi.org/10.1086/523362>, <https://doi.org/10.1086/523362>
- 655 Jay P, Chouteau M, Whibley A, Bastide H, Parrinello H, Llaurens V, Joron M (2021)  
656 Mutation load at a mimicry supergene sheds new light on the evolution of inver-  
657 sion polymorphisms. *Nature Genetics* 53(3):288–293, DOI 10.1038/s41588-020-00771-  
658 1, URL <https://www.nature.com/articles/s41588-020-00771-1>
- 659 Kardos M, Allendorf FW, Luikart G (2014) Evaluating the role of inbreeding depres-  
660 sion in heterozygosity-fitness correlations: how useful are tests for identity disequi-  
661 librium? *Molecular Ecology Resources* 14(3):519–530, DOI 10.1111/1755-0998.12193,  
662 URL <https://onlinelibrary.wiley.com/doi/10.1111/1755-0998.12193>
- 663 Kim BY, Huber CD, Lohmueller KE (2018) Deleterious varia-  
664 tion shapes the genomic landscape of introgression. *PLOS Ge-*  
665 *netics* 14(10):e1007741, DOI 10.1371/journal.pgen.1007741, URL  
666 <https://dx.plos.org/10.1371/journal.pgen.1007741>
- 667 Kimura M, Ohta T (1971) *Theoretical Aspects of Population Genetics*, monographs edn.  
668 Princeton University Press
- 669 Kirkpatrick M (2010) How and Why Chromosome Inversions Evolve. *PLoS*  
670 *Biology* 8(9):e1000501, DOI 10.1371/journal.pbio.1000501, URL  
671 <https://dx.plos.org/10.1371/journal.pbio.1000501>
- 672 Kirkpatrick M, Jarne P (2000) The Effects of a Bottleneck on Inbreeding Depression and

- 673 the Genetic Load. *The American Naturalist* 155(2):154–167, DOI 10.1086/303312,  
674 URL <https://www.journals.uchicago.edu/doi/10.1086/303312>
- 675 Kremling KAG, Chen SY, Su MH, Lepak NK, Romay MC, Swarts KL, Lu F, Lo-  
676 rant A, Bradbury PJ, Buckler ES (2018) Dysregulation of expression correlates  
677 with rare-allele burden and fitness loss in maize. *Nature* 555(7697):520–523, DOI  
678 10.1038/nature25966, URL <http://www.nature.com/articles/nature25966>
- 679 Lande R, Schemske DW (1985a) The evolution of self-fertilization and inbreeding de-  
680 pression in plants. i. genetic model. *Evolution* 39(1):24
- 681 Lande R, Schemske DW (1985b) The Evolution of Self-Fertilization and Inbreeding De-  
682 pression in Plants. I. Genetic Models. *Evolution* 39(1):24, DOI 10.2307/2408514, URL  
683 <https://www.jstor.org/stable/2408514?origin=crossref>
- 684 Larièpe A, Mangin B, Jasson S, Combes V, Dumas F, Jamin P, Lariagon C, Jolivot  
685 D, Madur D, Fiévet J, Gallais A, Dubreuil P, Charcosset A, Moreau L (2012) The  
686 Genetic Basis of Heterosis: Multiparental Quantitative Trait Loci Mapping Reveals  
687 Contrasted Levels of Apparent Overdominance Among Traits of Agronomical Interest  
688 in Maize (*Zea mays* L.). *Genetics* 190(2):795–811, DOI 10.1534/genetics.111.133447,  
689 URL <https://academic.oup.com/genetics/article/190/2/795/6064102>
- 690 Lewontin RC (1974) *The Genetic Basis of Evolutionary Change*. Columbia University  
691 Press
- 692 Llaurens V, Gonthier L, Billiard S (2009) The Sheltered Genetic Load  
693 Linked to the *S* Locus in Plants: New Insights From Theoret-  
694 ical and Empirical Approaches in Sporophytic Self-Incompatibility.  
695 *Genetics* 183(3):1105–1118, DOI 10.1534/genetics.109.102707, URL  
696 <https://academic.oup.com/genetics/article/183/3/1105/6063166>
- 697 Mable BK (2008) Genetic causes and consequences of the breakdown of self-  
698 incompatibility: case studies in the Brassicaceae. *Genetics Research* 90(1):47–60, DOI  
699 10.1017/S0016672307008907



- 700 McMullen MD, Kresovich S, Villeda HS, Bradbury P, Li H, Sun Q, Flint-Garcia S,  
701 Thornsberry J, Acharya C, Bottoms C, Brown P, Browne C, Eller M, Guill K, Harjes  
702 C, Kroon D, Lepak N, Mitchell SE, Peterson B, Pressoir G, Romero S, Rosas MO,  
703 Salvo S, Yates H, Hanson M, Jones E, Smith S, Glaubitz JC, Goodman M, Ware D,  
704 Holland JB, Buckler ES (2009) Genetic Properties of the Maize Nested Association  
705 Mapping Population. *Science* 325(5941):737–740, DOI 10.1126/science.1174320, URL  
706 <https://www.science.org/doi/10.1126/science.1174320>
- 707 Ohta T, Cockerham CC (1974) Detrimental genes with partial selfing and effects on a  
708 neutral locus. *Genetical Research* 23(2):191–200, DOI 10.1017/S0016672300014816
- 709 Ohta T, Kimura M (1969) Linkage disequilibrium at steady  
710 state determined by random genetic drift and recurrent muta-  
711 tion. *Genetics* 63(1):229–238, DOI 10.1093/genetics/63.1.229, URL  
712 <https://academic.oup.com/genetics/article/63/1/229/5989253>
- 713 Olito C, Ponnikas S, Hansson B, Abbott JK (2022) Consequences  
714 of partially recessive deleterious genetic variation for the evolu-  
715 tion of inversions suppressing recombination between sex chromo-  
716 somes. *Evolution* 76(6):1320–1330, DOI <https://doi.org/10.1111/evo.14496>,  
717 URL <https://onlinelibrary.wiley.com/doi/abs/10.1111/evo.14496>,  
718 <https://onlinelibrary.wiley.com/doi/pdf/10.1111/evo.14496>
- 719 van Oosterhout C, Zulstra WG, van Heuven MK, Brakefield PM (2000) Inbreeding de-  
720 pression and genetic load in laboratory metapopulations of the butterfly *Bicyclus*  
721 *anymana*. *Evolution* 54(1):218–225, DOI 10.1111/j.0014-3820.2000.tb00022.x, URL  
722 <https://onlinelibrary.wiley.com/doi/10.1111/j.0014-3820.2000.tb00022.x>
- 723 Rocheleau G, Lessard S (2000) Stability analysis of the partial selfing selection model.  
724 *Journal of Mathematical Biology* 40(6):541–574, DOI 10.1007/s002850000030, URL  
725 <https://doi.org/10.1007/s002850000030>
- 726 Roze D (2015) Effects of interference between selected loci on the mutation load, in-  
727 breeding depression, and heterosis. *Genetics* 201:745–757

- 728 Seymour DK, Chae E, Grimm DG, Martín Pizarro C, Habring-Müller A, Vasseur  
729 F, Rakitsch B, Borgwardt KM, Koenig D, Weigel D (2016) Genetic architec-  
730 ture of nonadditive inheritance in *Arabidopsis thaliana* hybrids. Proceedings of  
731 the National Academy of Sciences 113(46), DOI 10.1073/pnas.1615268113, URL  
732 <https://pnas.org/doi/full/10.1073/pnas.1615268113>
- 733 Sianta SA, Peischl S, Moeller DA, Brandvain Y (2021) Genetic load may  
734 increase or decrease with selfing depending upon the recombination en-  
735 vironment. preprint, Genetics, DOI 10.1101/2021.05.20.445016, URL  
736 <http://biorxiv.org/lookup/doi/10.1101/2021.05.20.445016>
- 737 Spigler RB, Theodorou K, Chang SM (2017) Inbreeding depression and drift load  
738 in small populations at demographic disequilibrium. Evolution 71(1):81–94, DOI  
739 10.1111/evo.13103
- 740 Sved JA (1971) Linkage disequilibrium and homozygosity of chromo-  
741 some segments in finite populations. Theoretical Population Biology  
742 2(2):125–141, DOI [https://doi.org/10.1016/0040-5809\(71\)90011-6](https://doi.org/10.1016/0040-5809(71)90011-6), URL  
743 <https://www.sciencedirect.com/science/article/pii/0040580971900116>
- 744 Takebayashi N (2003) Patterns of Variation Within Self-Incompatibility Loci. Molec-  
745 ular Biology and Evolution 20(11):1778–1794, DOI 10.1093/molbev/msg209, URL  
746 <https://academic.oup.com/mbe/article-lookup/doi/10.1093/molbev/msg209>
- 747 Tallmon DA, Luikart G, Waples RS (2004) The alluring simplic-  
748 ity and complex reality of genetic rescue. Trends in Ecology  
749 & Evolution 19(9):489–496, DOI 10.1016/j.tree.2004.07.003, URL  
750 <https://www.sciencedirect.com/science/article/pii/S0169534704001843>
- 751 Uyenoyama M, Holsinger K, Waller D (1993) Ecological and genetic factors directing  
752 the evolution of self-fertilization. Oxford Surveys in Evolutionary Biology 9:327 – 381
- 753 Uyenoyama MK, Waller DM (1991) Coevolution of self-fertilization and in-  
754 breeding depression II. Symmetric overdominance in viability. Theoretical

- 755 Population Biology 40(1):47–77, DOI 10.1016/0040-5809(91)90046-I, URL  
756 <https://linkinghub.elsevier.com/retrieve/pii/004058099190046I>
- 757 Waller DM (2021) Addressing Darwin’s dilemma: Can pseudo-overdominance ex-  
758 plain persistent inbreeding depression and load? *Evolution* 75(4):779–793, DOI  
759 10.1111/evo.14189, URL <https://onlinelibrary.wiley.com/doi/10.1111/evo.14189>
- 760 Whitlock M, Ingvarsson PK, Hatfield T (2000) Local drift load and the heterosis of  
761 interconnected populations. *Heredity* 84:452–457
- 762 Wickham H (2016) *ggplot2: Elegant Graphics for Data Analysis*. Springer-Verlag New  
763 York, URL <https://ggplot2.tidyverse.org>
- 764 Willi Y, Griffin P, Van Buskirk J (2013) Drift load in populations of small size and low  
765 density. *Heredity* 110(3):296–302, DOI 10.1038/hdy.2012.86
- 766 Winn AA, Elle E, Kalisz S, Cheptou PO, Eckert CG, Goode C, Johnston MO, Moeller  
767 DA, Ree RH, Sargent RD, et al (2011) Analysis of inbreeding depression in mixed-  
768 mating plants provides evidence for selective interference and stable mixed mating.  
769 *Evolution* 65:3339–3359
- 770 Wu Q, Han TS, Chen X, Chen JF, Zou YP, Li ZW, Xu YC, Guo YL (2017)  
771 Long-term balancing selection contributes to adaptation in *Arabidopsis* and  
772 its relatives. *Genome Biology* 18(1):217, DOI 10.1186/s13059-017-1342-8, URL  
773 <https://doi.org/10.1186/s13059-017-1342-8>
- 774 Zhao L, Charlesworth B (2016) Resolving the conflict between associative  
775 overdominance and background selection. *Genetics* 203(3):1315–1334, DOI  
776 10.1534/genetics.116.188912, URL <https://www.genetics.org/content/203/3/1315>,  
777 <https://www.genetics.org/content/203/3/1315.full.pdf>
